# Supplementary material for: A new approach for atmospheric turbulence removal using low-rank matrix factorization
Source: PeerJ Comput Sci. 2024 Jan 31;10:e1713. doi: 10.7717/peerj-cs.1713 (PMC10909186; doi:10.7717/peerj-cs.1713)
Supplement: Supplemental Information 9 [file peerj-cs-10-1713-s009.docx]

| **Table S1 List of symbols and variables.** | |
| --- | --- |
| **Parameter or symbol** | **Description** |
|  | Sequence of turbulent images |
|  | Number of images |
|  | Dimension of each turbulent image |
|  | Basis matrix |
|  | Coefficient matrix |
|  | row vector of *U* |
|  | row vector of *V* |
|  | Image noise per pixel of the turbulent image |
|  | Gaussian distribution with zero mean and variance |
|  | Matrix of non-negative weights |
|  | Turbulence-free images |
|  | Diagonal matrix with elements |
|  | Identity matrix |
|  | Transformation matrix |
|  | Transformation operator |
|  | Jacobian matrix of image |
|  | Soft thresholding operator |
|  | Penalty value in ADMM algorithm |
| *P* | Step of the ADMM algorithm |
|  | Minimum allowable size of window |
|  | Maximum allowable size of window |
